# Supplementary material for: Organic electrochemical transistors as novel biosensing platforms to study the electrical response of whole blood and plasma
Source: Royal Society of Chemistry journal article supplement (doi:10.1039/d1tb01584b), 2021-11-22
Supplement: d1tb01584b1.pdf [file d1tb01584b1.pdf]

## ARTICLE

# Organic electrochemical transistors as novel biosensing platforms to study the electrical response of whole blood and plasma

Received 00th January 20xx,  
Accepted 00th January 20xx

DOI: 10.1039/x0xx00000x

Valentina Preziosi,<sup>a\*</sup> Mario Barra,<sup>b\*</sup> Giovanna Tomaiuolo,<sup>a</sup> Pasquale D'Angelo,<sup>c</sup> Simone Luigi Marasso,<sup>c,d</sup> Alessio Verna,<sup>d</sup> Matteo Cocuzza,<sup>c,d</sup> Antonio Cassinese<sup>b,c</sup> and Stefano Guido<sup>a,f,g</sup>

**This file includes:**

Supplementary Figures S1-S5

<sup>a</sup>Department of Chemical, Materials and Production Engineering - University Federico II – P.le Tecchio 80, I-80125 Naples, Italy

<sup>b</sup>CNR-SPIN, c/o Department of Physics "Ettore Pancini", P.le Tecchio, 80, I-80125 Napoli, Italy

<sup>c</sup>IMEM-CNR, Parco Area delle Scienze 37/A, I-43124 Parma, Italy

<sup>d</sup>Chi-Lab, Department of Applied Science and Technology, Politecnico di Torino, C.so Duca degli Abruzzi 24, 10129 Torino, Italy

<sup>e</sup>Department of Physics "Ettore Pancini", University Federico II – P.le Tecchio 80, I-80125 Naples, Italy

<sup>f</sup>National Interuniversity Consortium for Materials Science and Technology (INSTM), 50121 Firenze, Italy

<sup>g</sup>CEINGE, Advanced Biotechnologies, 80145 Napoli, Italy

† Footnotes relating to the title and/or authors should appear here.

Electronic Supplementary Information (ESI) available: [details of any supplementary information available should be included here]. See DOI: 10.1039/x0xx00000x

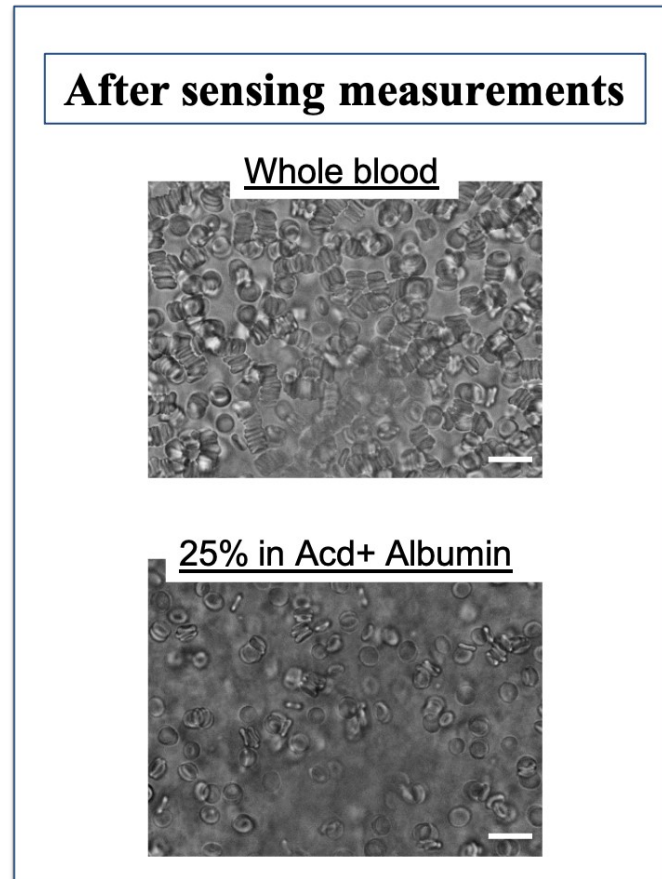

Fig. S1: Optical images of whole blood and of RBC at 25% suspended in ACD plus Albumin just after OECT experiments. Scale bar is 20  $\mu\text{m}$ .

## ARTICLE

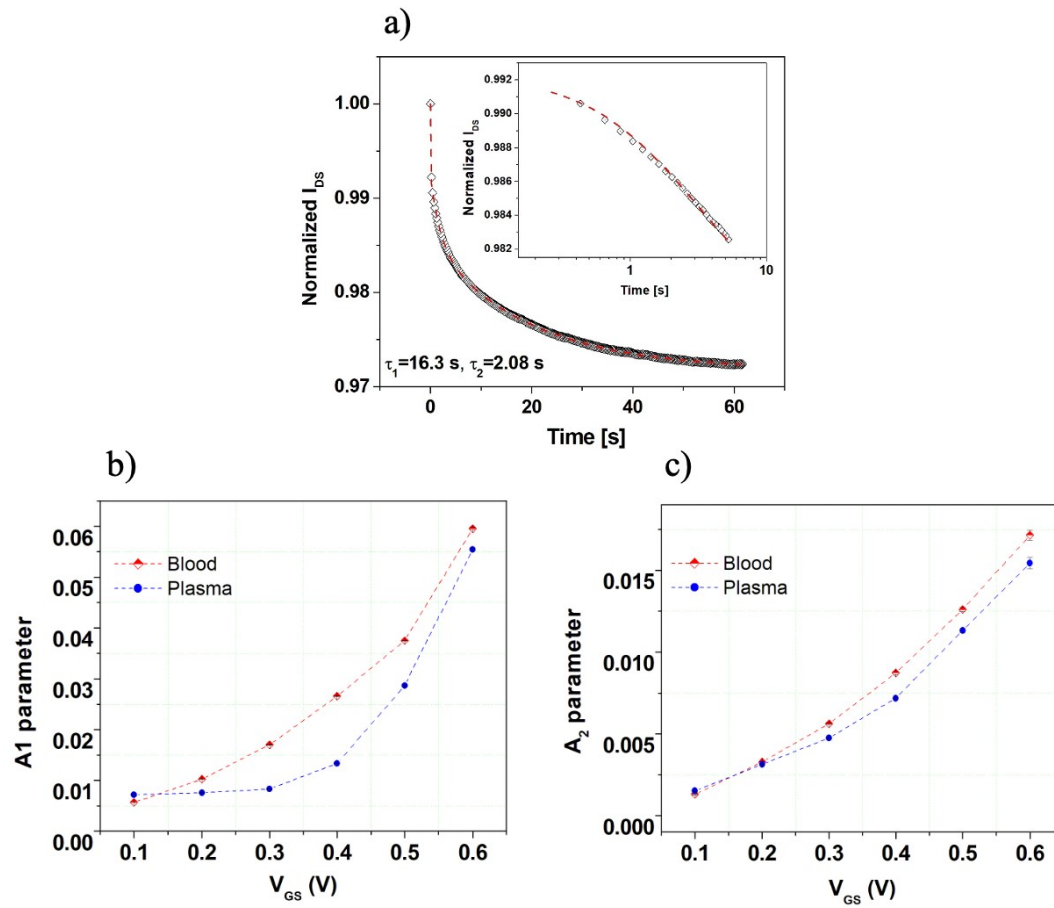

Fig. S2: a) An exemplificative single  $I_{DS}$  vs time curve (symbol) with the related fitting curve (dashed line). The semi-log plot in the inset provides a zoomed view of the curves during the first 10 seconds; b) A1 and c) A2 pre-factors as a function of  $V_{GS}$  extracted by fitting experimental  $I_{DS}(t)$  curves with the equation 1 for whole blood and plasma.

## ARTICLE

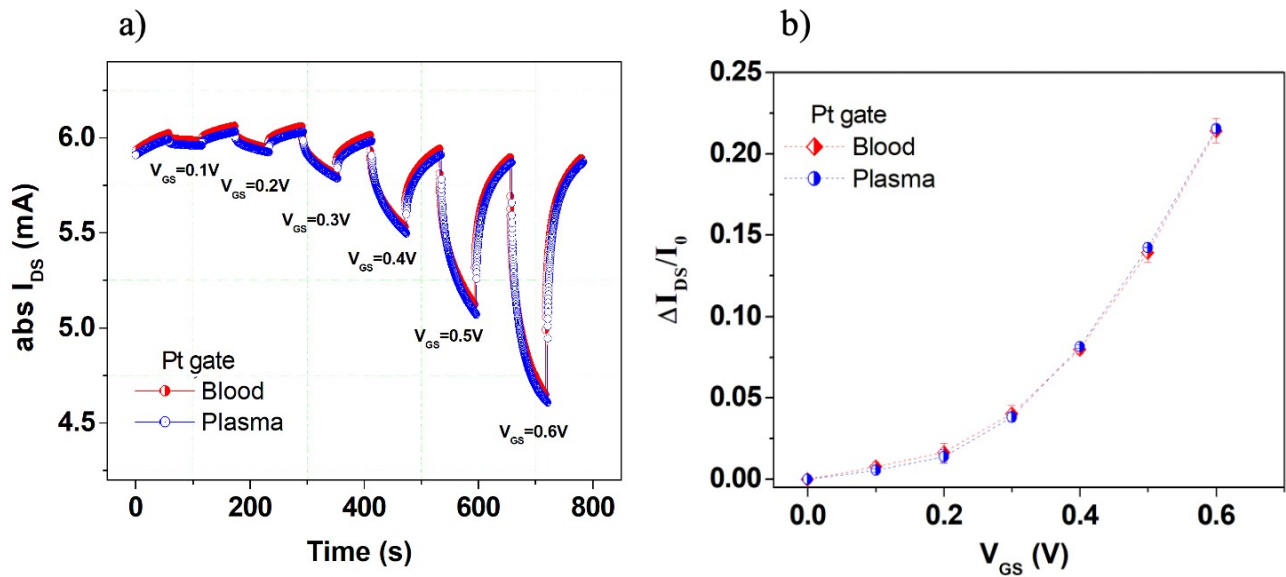

Fig. S3: OECT electrical response. a) OECT pulsed measurements reporting  $\text{abs } I_{\text{DS}}$  as a function of time for plasma and whole blood by using a platinum gate electrode; b) OECT modulation ratio ( $\Delta I_{\text{DS}}/I_0$ ) as a function of  $V_{\text{GS}}$  for whole blood and plasma using a platinum gate electrode.

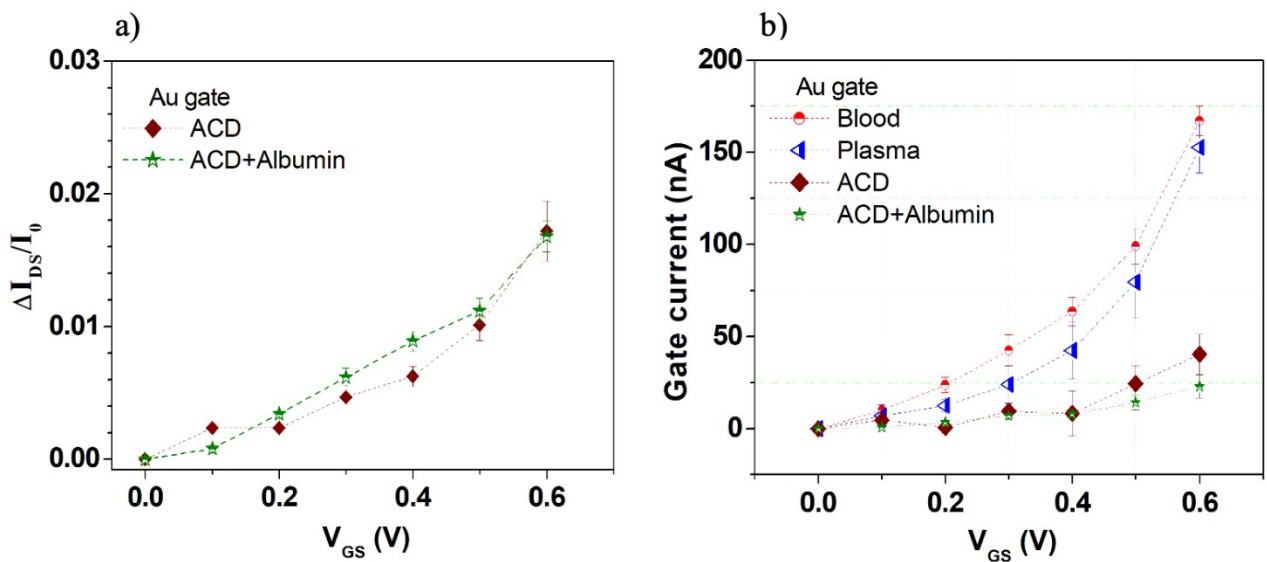

Fig. S4: a) OECT modulation ratio ( $\Delta I_{\text{DS}}/I_0$ ) as a function of  $V_{\text{GS}}$  for ACD and ACD plus Albumin using a gold gate. b) Comparison of gate current as a function of  $V_{\text{GS}}$  for whole blood, plasma, ACD and ACD plus Albumin.

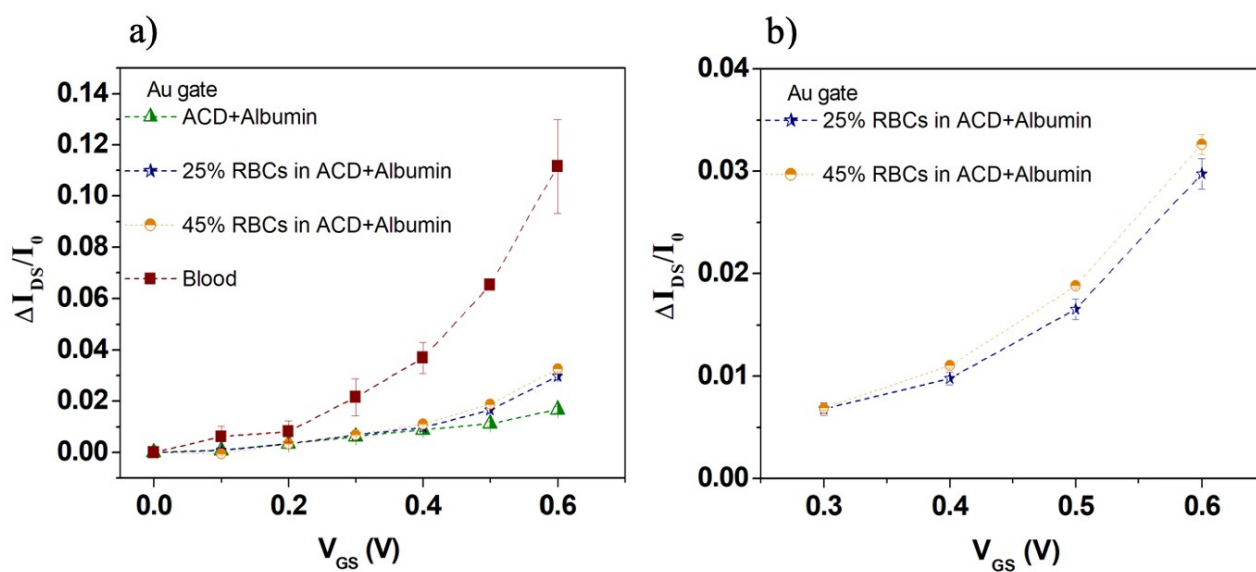

Fig. S5. a) OECT modulation ratio ( $\Delta I_{DS}/I_0$ ) as a function of  $V_{GS}$  for ACD plus Albumin, 25% and 45% suspended in ACD plus Albumin and whole blood using a gold gate. b) Comparison of ( $\Delta I_{DS}/I_0$ ) between 25% and 45% suspended in ACD plus Albumin.
